## CORRESPONDENCE

observed after anesthesia for nonabdominal procedures.<sup>5</sup> The anesthesia literature has only a few relevant articles discussing the occurrence of pancreatitis in association with the administration of narcotics<sup>6</sup> and occasionally with cardiopulmonary bypass procedures.<sup>7,8</sup> Continued study and monitoring of anesthesia patients will be necessary to better understand the causes of this serious postoperative event. As in the past, Zeneca will continue to monitor adverse events reported in temporal relationship with the administration of Diprivan, including reports of pancreatitis.

**David B. Goodale, D.D.S., Ph.D.**

Associate Director of Anesthesia

**Kasia Suljaga-Petchel, M.D.**

Director, Product Safety and Pharmacoepidemiology  
Clinical and Medical Affairs

Zeneca Pharmaceuticals

Wilmington, Delaware 19897-2200

## References

1. Ditschuneit H: Hyperlipoproteinemia in the pathogenesis of acute pancreatitis. *Acute Pancreatitis*. Edited by Beger HG, Büchler M. Berlin, Springer, 1987, pp 32-40

2. Farmer RG, Winkelman EI, Brown HB, Lewis LA: Hyperlipoproteinemia and pancreatitis. *Am J Med* 1973; 54:161-5
3. Toskes PP: Is there a relationship between hypertriglyceridemia and development of alcohol- or gallstone-induced pancreatitis? (editorial). *Gastroenterology* 1994; 106:810-2
4. Piittikangas C-O, Salo M, Riutta A, Pertilä J, Peltola O, Kirvelä O: Effects of propofol and intralipid on immune response and prostaglandin E<sub>2</sub> production. *Anaesthesia* 1995; 50:317-21
5. Singh LM, Okukubo F, James PM Jr, Salmon J, Howard JM: Further studies on postoperative pancreatitis. *Arch Surg* 1965; 90:43-9
6. Gould RJ, Van Kley H, Knight WA Jr: Elevation of serum amylase levels after narcotic administration. *S Med J* 1982; 75:711-2, 725
7. Lefor AT, Vuocolo P, Parker FB Jr, Sillin LF: Pancreatic complications following cardiopulmonary bypass. *Arch Surg* 1992; 127:1225-30
8. Castillo CF-D, Harringer W, Warshaw AL, Vlahakes GJ, Koski G, Zaslavsky AM, Rattner DW: Risk factors for pancreatic cellular injury after cardiopulmonary bypass. *N Engl J Med* 1991; 325:382-7

(Accepted for publication August 17, 1995.)

Anesthesiology

1996; 84:237

© 1996 American Society of Anesthesiologists, Inc.

Lippincott-Raven Publishers

## Payment for Routine Postoperative Patient-controlled Analgesia

**To the Editor:**—Recently Mackey *et al.*<sup>1</sup> faulted the Health-Care Financing Administration (HCFA) Policy for not reimbursing anesthesiologists for postoperative patient-controlled analgesia (PCA), thereby impeding optimum postoperative pain management.

Their comment suggesting that postoperative pain management has been poorly managed in the past seems correct. Their equating the risks of postoperative epidural analgesia with PCA seems to be exaggeration. However, that is incidental.

Looked at from the perspective of HCFA and the public, who ultimately pay health-care costs, routinely reimbursing anesthesiologists for PCA postoperative pain management adds another level of costs to health care. Additionally, it tends to add to the fragmentation of individuals; patients are too often seen as collections of anatomic parts or functions. It would be better for surgeons and patients if routine postoperative pain were not seen as a separate symptom needing treatment by an anesthesiologist.

We anesthesiologists must become more efficient and work more closely with our surgical colleagues. Health-care money spent on our inefficiency will not be available in the future for higher priorities, such as research and new technology.

Patients deserve empathetic and compassionate relief of postoperative pain. It may not need to be optimum, but it should be safe

and effective. PCA can be a valuable tool for this; we can help by giving our surgical colleagues practical information on using and monitoring the safety and effectiveness of PCA. Once we have done this, we will have a reasonable defense for our charges, as consultants in the special circumstances that Mackey *et al.* refer to, that the HCFA policy allows.

**James E. Waun, M.D.**

4256 Sugar Maple

Okemos, Michigan 48864-3225

## Reference

1. Mackey DC, Ebener MK, Howe BL: Patient-controlled analgesia and the acute pain service in the United States: Health-Care Financing Administration Policy is impeding optimal patient-controlled analgesia management (letter). *ANESTHESIOLOGY* 1995; 83:433-4

(Accepted for publication September 28, 1995.)
